# Supplementary material for: The Epidemiology of Alcohol Use and Alcohol Use Disorders among Young People in Northern Tanzania
Source: PubMed Central journal article supplement (PMC4596556; doi:10.1371/journal.pone.0140041), 2015-10-07
Supplement: pone.0140041.s002.pdf [file pone.0140041.s002.pdf]

**SECTION 3: ALCOHOL ADDITIONAL INFORMATION**

Thank you for providing responses to the alcohol questions so far this is highly appreciated. We have another set of questions to collect additional information related to alcohol. Please take a few minutes to complete this part. Your responses are very important and we hope to learn a lot from this information.
