# Supplementary material for: The Epidemiology of Alcohol Use and Alcohol Use Disorders among Young People in Northern Tanzania
Source: PubMed Central journal article supplement (PMC4596556; doi:10.1371/journal.pone.0140041), 2015-10-07
Supplement: pone.0140041.s003.pdf [file pone.0140041.s003.pdf]

Pictures of beers and standard drinks  
**LOCALLY AVAILABLE INDUSTRIAL MADE BEERS IN MWANZA, TANZANIA**  
 Alcohol concentration expressed as Alcohol concentration by volume (ABV)

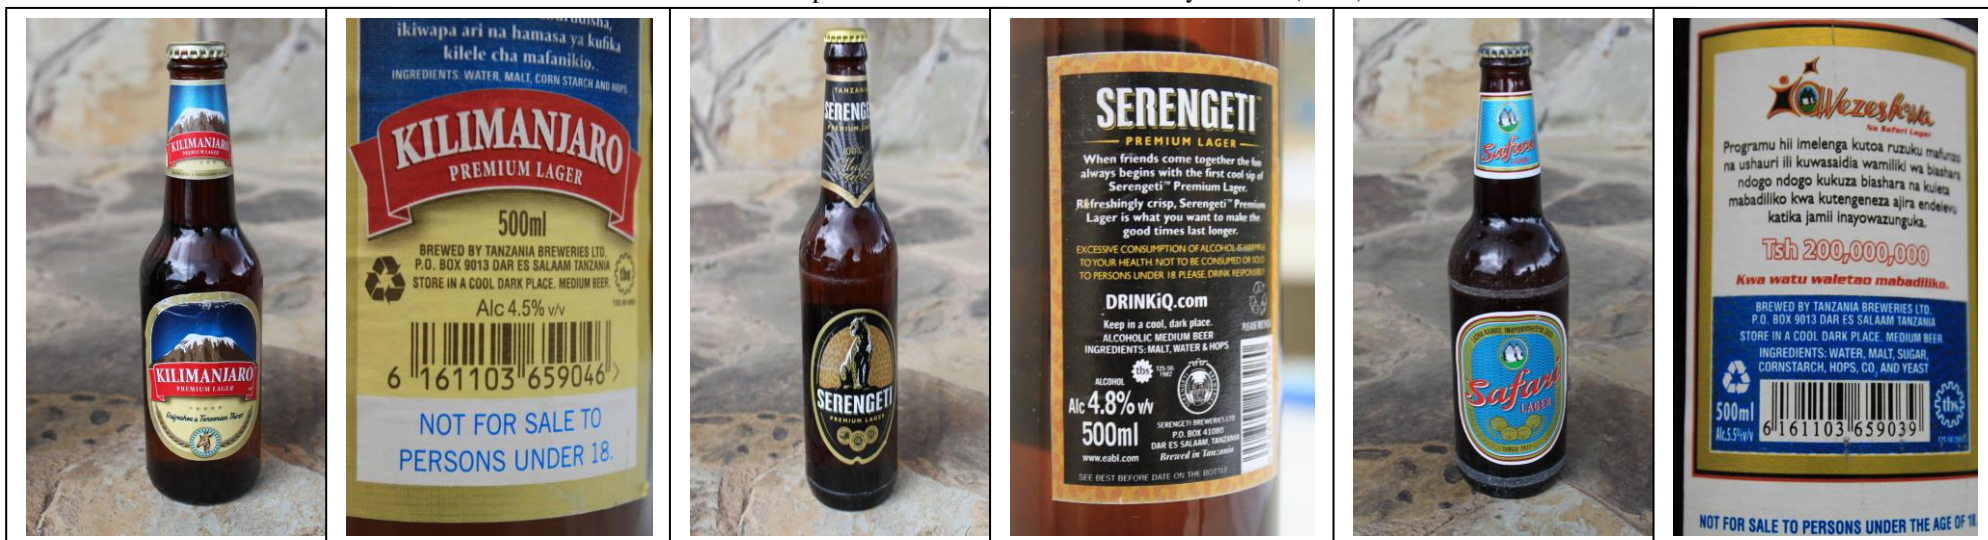

Kilimanjaro Premium Lager, 4.5% ABV, 500ml  
 (2 standard drinks)

Serengeti Premium Lager, 4.8% ABV, 500ml  
 (2 standard drinks)

Safari Lager, 5.5% ABV, 500ml  
 (3 standard drinks)

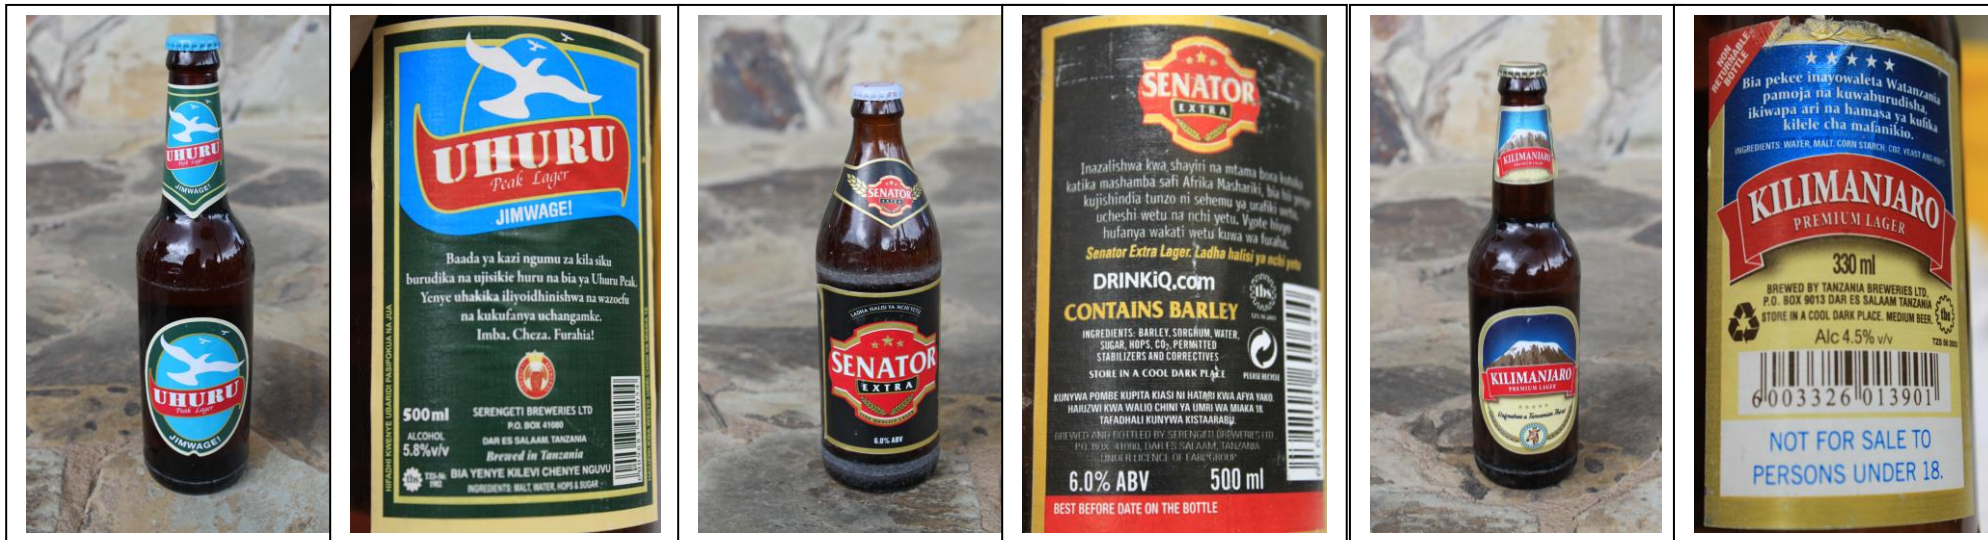

Uhuru Peak Lager, 5.5% ABV, 500ml  
 (3 standard drinks)

Senator Extra Lager, 6.0% ABV, 500ml  
 (3 standard drinks)

Kilimanjaro Premium Lager, 4.5% ABV, 330ml  
 (1 standard drink)



## LOCALLY AVAILABLE INDUSTRIAL MADE BEERS IN MWANZA, TANZANIA

Alcohol concentration expressed as Alcohol concentration by volume (ABV)

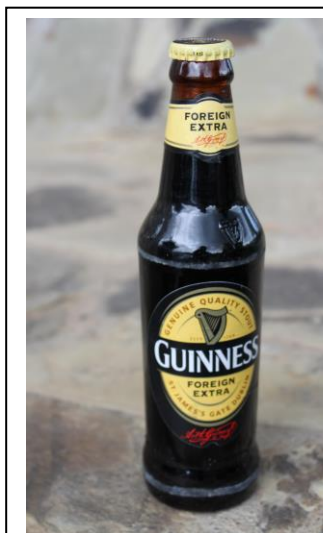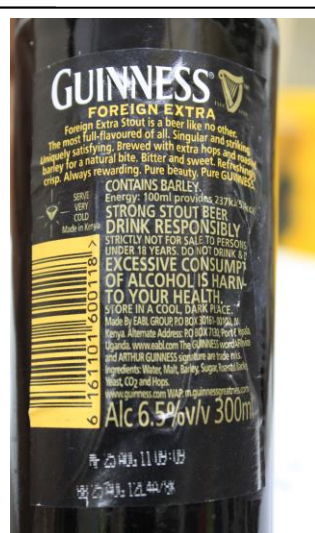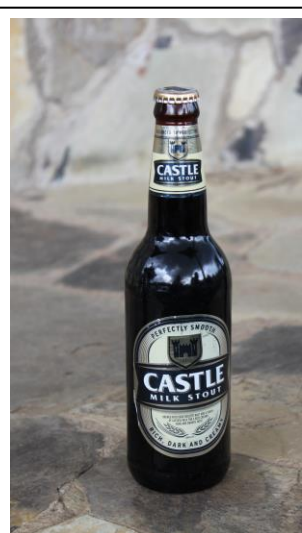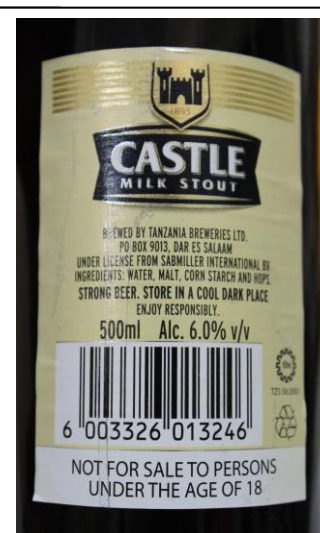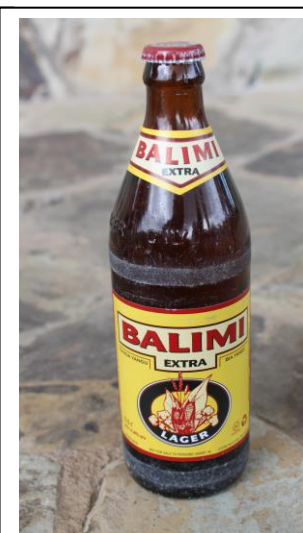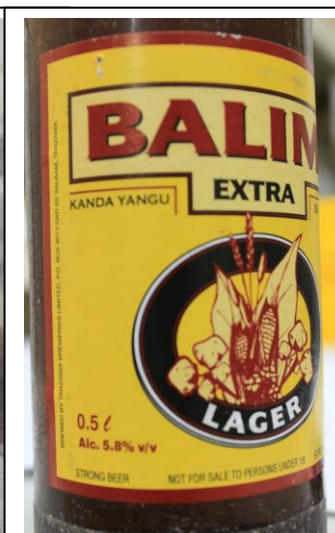

Guinness Foreign Extra, 6.5%ABV, 300ml  
(2 standard drinks)

Castle Milk Stout, 6.0% ABV, 500ml  
(3 standard drinks)

Balimi Extra, 5.8% ABV, 500ml  
(3 standard drinks)

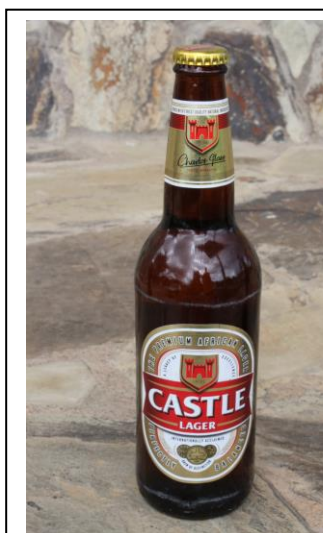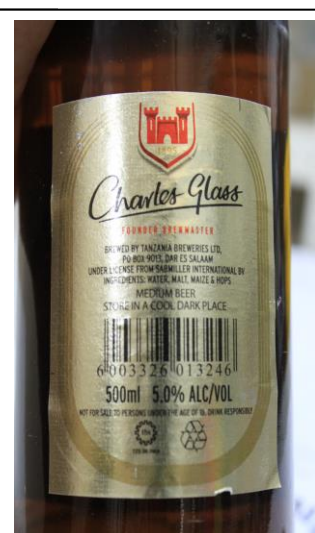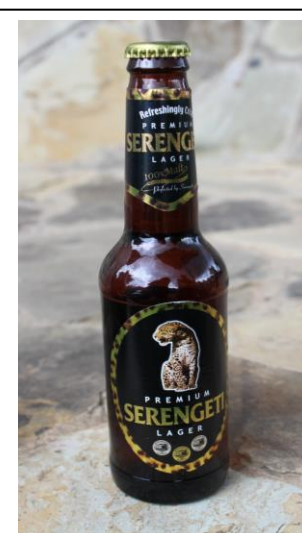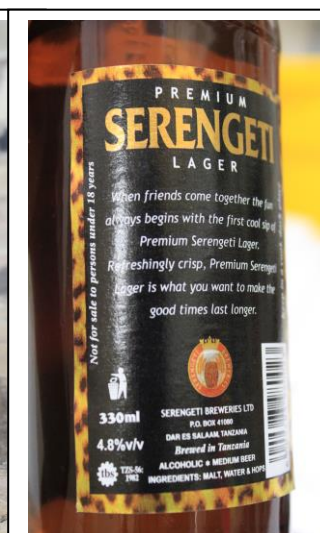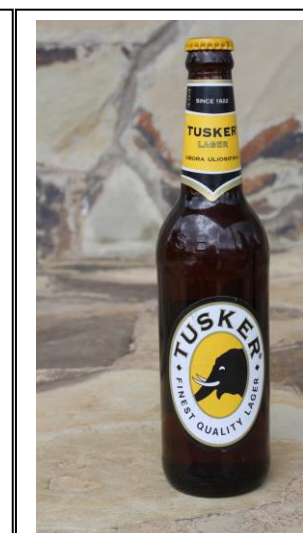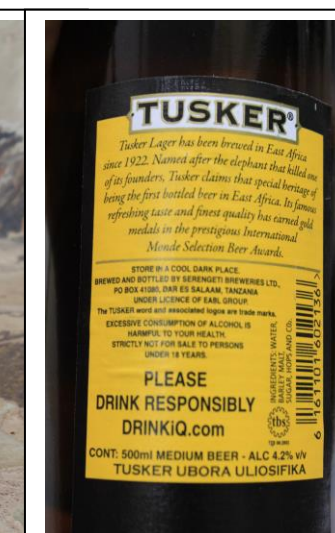

Castle Lager, 5.0% ABV, 500ml  
(3 standard drinks)

Serengeti Premium Lager, 4.8% ABV, 330ml  
(2 standard drinks)

Tusker Lager, 4.2% ABV, 500ml  
(2 standard drinks)



## LOCALLY AVAILABLE INDUSTRIAL MADE BEERS IN MWANZA, TANZANIA

Alcohol concentration expressed as Alcohol concentration by volume (ABV)

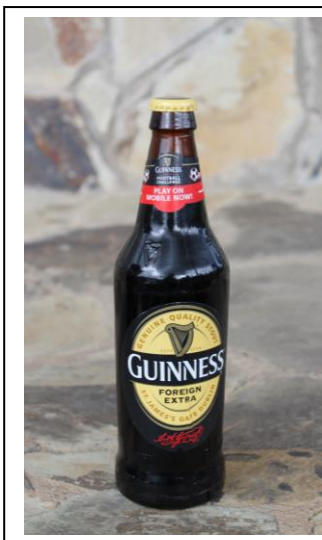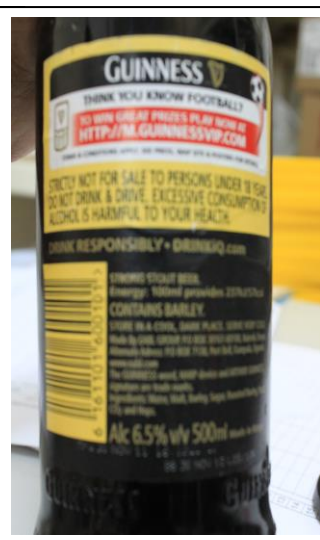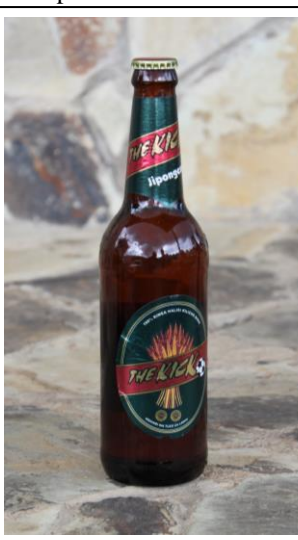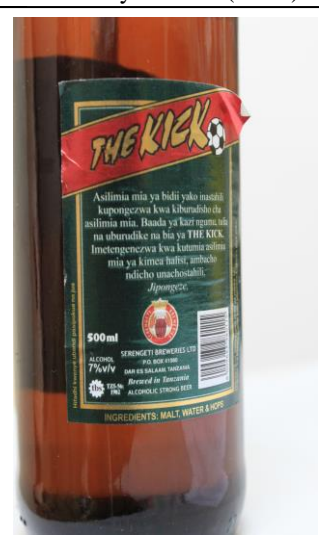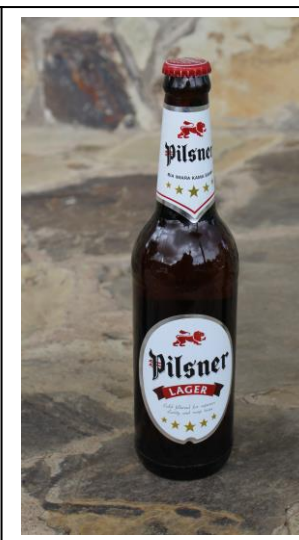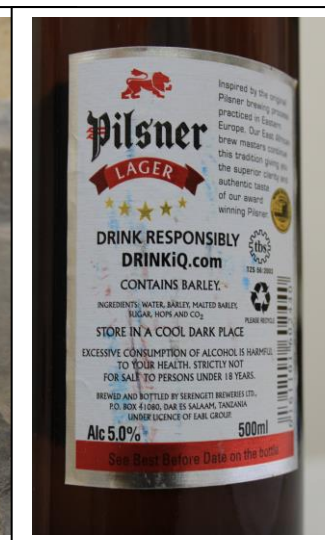

Guinness Foreign Extra, 6.5% ABV, 500ml  
(3 standard drinks)

The Kick, 7.0% ABV, 500ml  
(4 standard drinks)

Pilsner Lager, 5.0% ABV, 500ml  
(3 standard drinks)

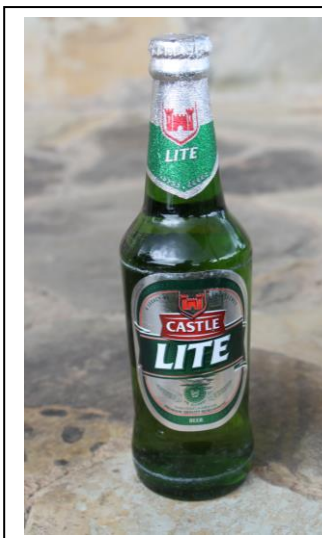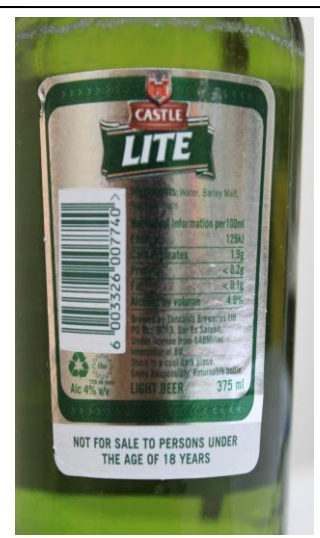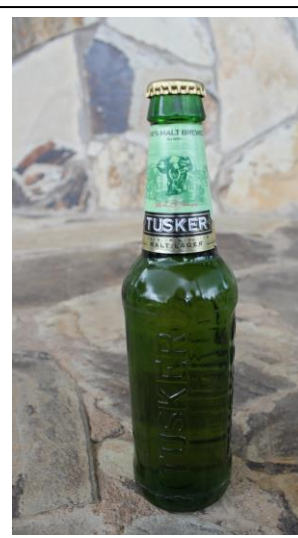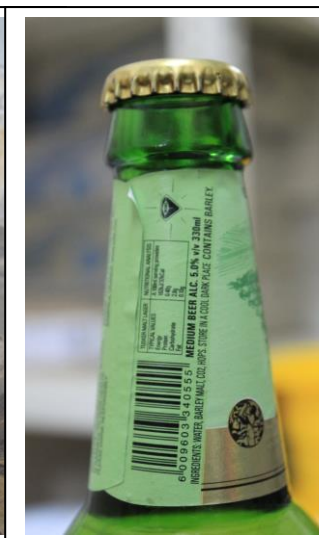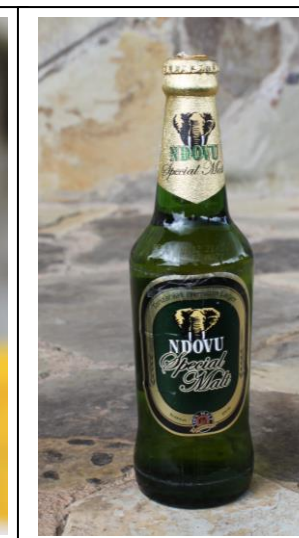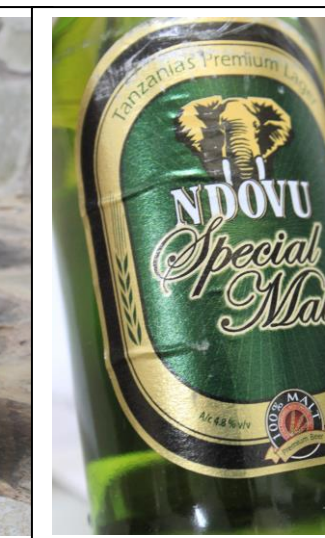

Castle Lite, 4.0% ABV, 375ml  
(2 standard drinks)

Tusker Malt Lager, 5.0% ABV, 330ml  
(2 standard drinks)

Ndovu Special Malt, 4.8% ABV, 375ml  
(2 standard drinks)



## LOCALLY AVAILABLE INDUSTRIAL MADE BEERS IN MWANZA, TANZANIA

Alcohol concentration expressed as Alcohol concentration by volume (ABV)

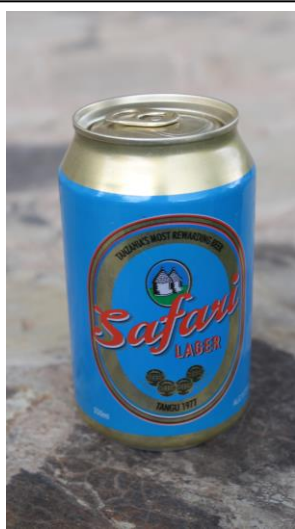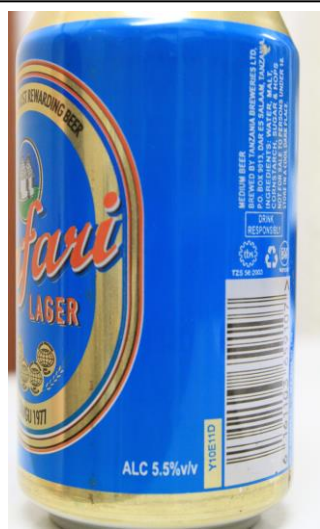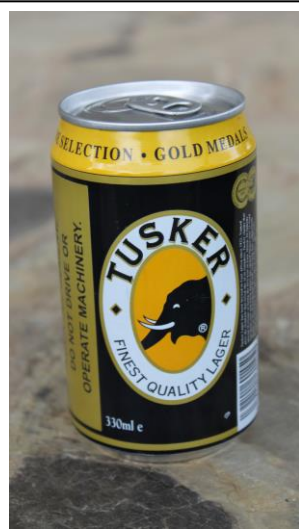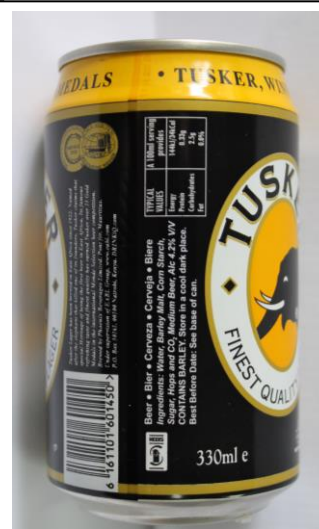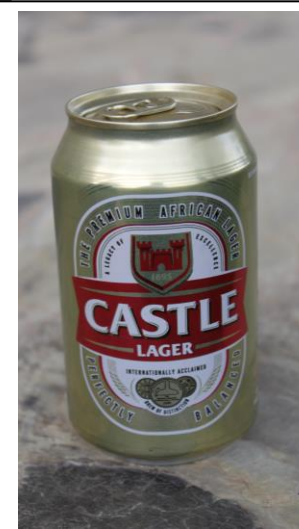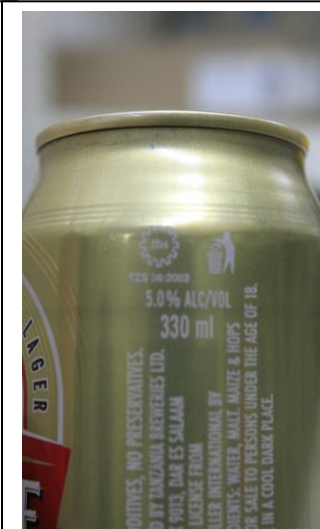

Safari Lager, 5.5% ABV, 330ml  
(2 standard drinks)

Tusker Lager, 4.2% ABV, 330ml  
(1 standard drink)

Castle Lager, 5.0% ABV, 330ml  
(2 standard drinks)

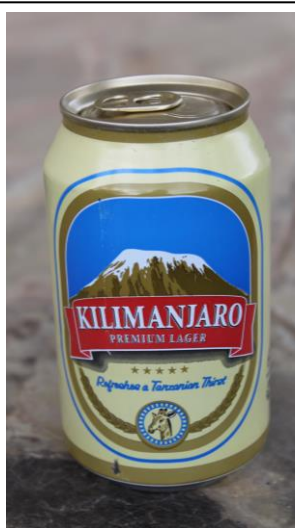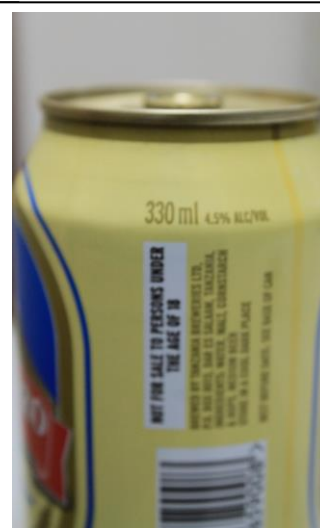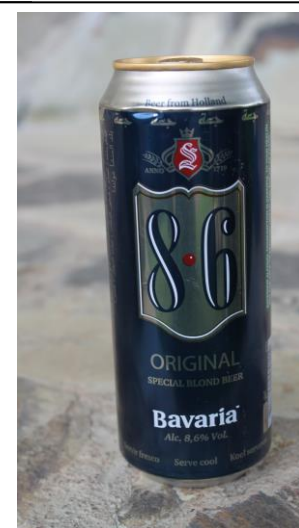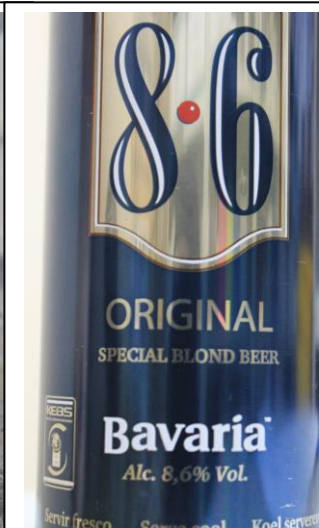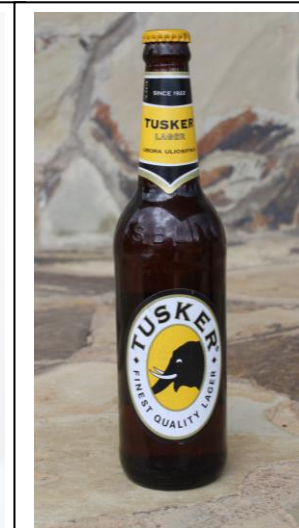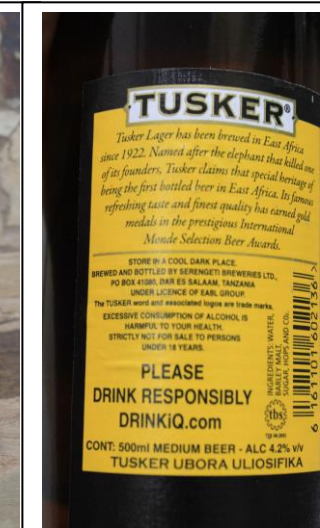

Kilimanjaro Premium Lager, 4.5% ABV, 330ml  
(1 standard drink)

Bavaria Lager, 8.6% ABV, 500ml  
(4 standard drinks)

Tusker Lager, 4.2% ABV, 500ml  
(2 standard drinks)
