# Supplementary material for: The Epidemiology of Alcohol Use and Alcohol Use Disorders among Young People in Northern Tanzania
Source: PubMed Central journal article supplement (PMC4596556; doi:10.1371/journal.pone.0140041), 2015-10-07
Supplement: pone.0140041.s004.pdf [file pone.0140041.s004.pdf]

**S1 Table: Patterns of reported alcohol use using the Time Line Follow Back Calendar among young people who report alcohol use in the past 60 days in northern Tanzania**

| Variables                             | Responses                                        | Secondary school students <sup>2</sup> |                | College and university students <sup>2</sup> |                 | Employed in local industries <sup>3</sup> |                 | Casual labourers <sup>3</sup> |                 |
|---------------------------------------|--------------------------------------------------|----------------------------------------|----------------|----------------------------------------------|-----------------|-------------------------------------------|-----------------|-------------------------------|-----------------|
|                                       |                                                  | Female                                 | Male           | Female                                       | Male            | Female                                    | Male            | Female                        | Male            |
| Sample                                | N <sup>1</sup>                                   | 9                                      | 20             | 41                                           | 72              | 14                                        | 41              | 13                            | 81              |
| Time line followback calendar 60 days | Events-median &IQR                               | 2[1-2]                                 | 4[2-7]         | 1[1-5]                                       | 5[2-8]          | 1[1-3]                                    | 4[2-6]          | 6[4-10]                       | 6[3-10]         |
|                                       | Drinks in 60 days-median &IQR                    | 2.5[1.3-9.0]                           | 20.0[3.5-49.0] | 6[2-36]                                      | 39.8[12-62.6]   | 0.8[0.3-12.0]                             | 21.0[6.0-44.0]  | 18.0[8.0-30.0]                | 40.8[12.5-73.6] |
|                                       | Drinks in 30 days-median&IQR                     | 1.3[0.6-4.5]                           | 10.0[1.8-24.5] | 3[1-18]                                      | 19.9[6-31.3]    | 0.4[0.2-6.0]                              | 10.5[3.0-22.0]  | 9.0[4.0-15.0]                 | 20.4[6.2-36.8]  |
|                                       | Drinks per event-median&IQR                      | 1.3[1.3-4.5]                           | 4.0[2.2-6.0]   | 4.2[2.0-6.0]                                 | 7.5[4.9-9.8]    | 1.0[0.3-4.0]                              | 6.0[3.5-8.3]    | 3.3[1.0-4.0]                  | 6.8[2.8-9.4]    |
|                                       | Days drinking in a month-median                  | 1[1-1]                                 | 2[1-4]         | 1[1-3]                                       | 2[1-4]          | 1[1-2]                                    | 2[1-3]          | 3[2-5]                        | 3[2-5]          |
|                                       | Heavy episodic drinking <sup>4</sup> (% , 95%CI) | 7.5[0-25.4]                            | 26.7[0.0-33.0] | 26.3[14.9-55.0]                              | 71.2[51.0-91.1] | 7.1[0.0-25.0]                             | 51.2[36.7-66.7] | 7.7[0.0-8.3]                  | 56.8[47.8-71.2] |

. <sup>1</sup>Actual number of respondents without sampling weights applied. <sup>2</sup>Median are weighted estimates. <sup>3</sup>Median without sampling weights applied. <sup>4</sup>Heavy episodic drinking is defined as average of 6 or more standard drinks in a drinking occasion
