# Supplementary material for: The Epidemiology of Alcohol Use and Alcohol Use Disorders among Young People in Northern Tanzania
Source: PubMed Central journal article supplement (PMC4596556; doi:10.1371/journal.pone.0140041), 2015-10-07
Supplement: pone.0140041.s005.pdf [file pone.0140041.s005.pdf]

**S 2 Table: Description of factors for initiation and persistence of alcohol use among young people in northern Tanzania**

| Variables                                                     | Responses                     | Secondary school students <sup>4</sup> |                 | College and university students <sup>4</sup> |                 | Employed in local industries <sup>5</sup> |                 | Casual labourers <sup>5</sup> |                 |
|---------------------------------------------------------------|-------------------------------|----------------------------------------|-----------------|----------------------------------------------|-----------------|-------------------------------------------|-----------------|-------------------------------|-----------------|
|                                                               |                               | Female                                 | Male            | Female                                       | Male            | Female                                    | Male            | Female                        | Male            |
| <b>Sample</b>                                                 | <b>N<sup>1</sup></b>          | 63                                     | 101             | 111                                          | 169             | 58                                        | 152             | 23                            | 272             |
| <b>First drinking occasion among ever users</b>               | Holiday(festivity/recreation) | 23.6[18.4-28.6]                        | 20.1[16.6-25.8] | 22.4[17.1-28.3]                              | 21.9[17.6-24.2] | 22.4[13.7-37.9]                           | 30.9[26.2-36.0] | 26.1[0.0-30.8]                | 37.5[33.3-41.2] |
|                                                               | Wedding                       | 3.8[0.0-7.8]                           | 13.4[4.0-29.2]  | 15.7[7.3-18.5]                               | 9.2[0.8-10.9]   | 8.6[2.8-16.0]                             | 7.2[2.8-12.5]   | 17.4[0.0-50.0]                | 8.1[5.0-10.7]   |
|                                                               | School party                  | 6.9[0.0-11.8]                          | 1.2[0.0-3.7]    | 5.2[4.5-7.5]                                 | 19.1[8.2-25.2]  | 6.9[0.0-11.2]                             | 2.6[0.6-5.1]    | 4.3[0.0-5.1]                  | 2.9[0.8-5.1]    |
|                                                               | Party with friends            | 7.6[1.7-13.8]                          | 3.0[0.0-7.9]    | 7.7[6.0-10.3]                                | 6.5[0.4-7.6]    | 6.9[0.0-18.6]                             | 4.6[1.3-7.9]    | 8.7[0.0-100]                  | 4.0[1.5-6.6]    |
|                                                               | Other family celebration      | 17.3[7.3-32.7]                         | 33.6[31.0-36.8] | 13.5[10.3-24.6]                              | 11.5[9.8-11.8]  | 20.7[11.0-37.0]                           | 16.4[11.0-22.2] | 17.4[0.0-20.5]                | 16.2[10.7-19.9] |
|                                                               | Not a special occasion        | 25.9[16.7-34.8]                        | 23.4[3.6-35.4]  | 20.7[18.5-31.4]                              | 25.7[16.0-43.4] | 22.4[8.7-28.4]                            | 32.9[26.0-39.0] | 21.7[0.0-25.6]                | 23.2[18.9-28.8] |
|                                                               | Other                         | 7.2[2.4-12.0]                          | 3.1[1.0-7.6]    | 5.4[2.7-7.2]                                 | 2.2[0.7-3.0]    | 3.4[0.0-11.1]                             | 4.6[1.0-8.0]    | 4.3[0.0-100.0]                | 4.8[2.3-8.8]    |
| <b>Drink at first occasion among ever users</b>               | Bottled beer                  | 30.9[12.1-43.6]                        | 40.5[20.5-48.5] | 59.7[56.6-69.9]                              | 66.0[52.0-68.8] | 51.7[39.0-69.0]                           | 55.3[48.0-63.2] | 34.8[21.1-100.0]              | 47.8[38.8-60.9] |
|                                                               | Wine                          | 4.9[0.0-12.5]                          | 1.0[0.5-1.8]    | 19.9[7.5-24.2]                               | 7.5[0.9-9.8]    | 6.9[0.0-16.7]                             | 1.3[0.0-3.0]    | 0.0                           | 0.0             |
|                                                               | Spirit/liquor                 | 5.6[0.5-10.0]                          | 13.0[7.1-15.7]  | 1.9[0.0-10.8]                                | 7.4[4.7-12.3]   | 0.0                                       | 11.8[7.3-17.0]  | 0.0                           | 10.7[7.7-15.6]  |
|                                                               | Local beer/spirit/liquor      | 44.5[30.5-66.4]                        | 31.8[17.8-67.2] | 13.8[6.1-16.2]                               | 17.7[16.6-23.8] | 36.2[20.0-48.1]                           | 27.6[18.1-37.4] | 39.1[0.0-46.2]                | 31.6[18.2-39.4] |
|                                                               | Other                         | 1.6[0.0-4.2]                           | 0.0             | 0.0                                          | 0.0             | 0.0                                       | 0.0             | 0.0                           | 0.0             |
|                                                               | More than one type            | 12.6[10.4-14.9]                        | 13.7[2.8-20.4]  | 4.6[1.0-16.2]                                | 1.5[0.1-9.1]    | 5.2[0.0-10.3]                             | 3.9[0.0-7.7]    | 26.1[0.0-30.8]                | 9.9[6.3-12.2]   |
| <b>Reason for drinking at first occasion among ever users</b> | Wanted to try                 | 51.8[44.7-58.0]                        | 43.9[41.6-48.6] | 33.0[27.1-49.6]                              | 48.8[36.4-53.8] | 44.8[31.5-61.5]                           | 36.2[29.1-44.5] | 60.9[0.0-100.0]               | 35.3[31.5-39.6] |
|                                                               | Convinced by a friend         | 0.4[0.2-0.7]                           | 18.9[15.4-22.4] | 2.5[0.0-9.7]                                 | 16.3[1.4-24.6]  | 0.0                                       | 17.1[10.0-24.2] | 0.0                           | 12.9[8.8-19.8]  |
|                                                               | Advice from parents/relatives | 4.1[0.0-8.5]                           | 8.1[4.2-11.0]   | 14.2[1.3-16.5]                               | 5.0[3.2-9.5]    | 3.4[0.0-8.2]                              | 7.2[1.8-11.3]   | 0.0                           | 3.3[1.0-6.3]    |

|                                                                        |                            |                 |                 |                 |                  |                  |                 |                  |                 |
|------------------------------------------------------------------------|----------------------------|-----------------|-----------------|-----------------|------------------|------------------|-----------------|------------------|-----------------|
|                                                                        | Convinced by a partner     |                 |                 |                 |                  | 0.0              | 0.7[0.0-1.9]    | 0.0              | 0.4[0.0-0.6]    |
|                                                                        | other                      | 0.1[0.0-0.4]    | 0               | 1.1[0.2-6.7]    | 2.3[0.7-8.9]     | 1.7[0.0-5.1]     | 1.3[0.0-3.8]    | 0.0              | 1.5[0.0-3.9]    |
|                                                                        | more than one reason       | 43.6[33.5-54.1] | 29.1[25.0-33.6] | 49.2[42.9-50.4] | 27.6[17.0-48.9]  | 50.0[35.8-64.1]  | 37.5[23.9-48.7] | 39.1[0.0-100.0]  | 46.7[36.1-53.1] |
|                                                                        |                            |                 |                 |                 |                  |                  |                 |                  |                 |
|                                                                        | N <sup>2</sup>             | 198             | 155             | 152             | 93               | 68               | 148             | 20               | 174             |
| <b>Reasons for not drinking among those never used alcohol</b>         | Parents                    | 91.4[87.4-93.9] | 91.0[87.0-95.8] | 73.3[67.3-76.5] | 85.7[77.4-89.8]  | 76.9[65.7-88.1]  | 65.0[58.6-73.2] | 44.4[25.0-100.0] | 74.7[68.5-80.5] |
|                                                                        | Relatives                  | 74.9[69.7-78.5] | 51.5[41.6-67.4] | 40.5[36.4-48.1] | 45.9[43.2-52.4]  | 52.3[35.9-67.3]  | 51.4[42.5-60.2] | 11.1[0.0-100.0]  | 60.0[53.2-67.2] |
|                                                                        | Religion                   | 59.6[54.0-66.0] | 69.5[60.3-77.7] | 67.1[60.4-70.3] | 92.8[78.0-98.7]  | 60.0[49.3-79.8]  | 62.9[52.0-70.5] | 33.3[0.0-100.0]  | 68.2[64.1-72.8] |
|                                                                        | Friends                    | 60.1[55.9-63.1] | 39.9[32.6-49.6] | 31.6[28.5-38.0] | 38.3[26.7-43.1]  | 43.1[26.3-56.0]  | 37.9[26.7-46.0] | 11.1[0.0-100.0]  | 33.5[26.0-42.3] |
|                                                                        | Afraid of side effects     | 91.6[88.3-94.3] | 93.1[90.9-95.4] | 92.7[90.8-96.8] | 97.6[91.6-100.0] | 95.4[91.8-100.0] | 92.1[84.5-97.2] | 88.9[81.8-100.0] | 91.2[87.1-95.2] |
|                                                                        |                            |                 |                 |                 |                  |                  |                 |                  |                 |
|                                                                        | N <sup>3</sup>             | 30              | 53              | 47              | 69               | 28               | 91              | 3                | 142             |
| <b>Reasons for not drinking in the past 12 months among ever users</b> | Parents                    | 60.2[38.9-81.4] | 78.6[71.6-85.4] | 63.3[47.2-66.8] | 45.9[41.5-63.9]  | 60.7[25.8-72.4]  | 50.5[37.0-61.3] | 66.7[0.0-100.0]  | 66.2[59.6-73.0] |
|                                                                        | Relatives                  | 51.5[38.0-61.7] | 45.9[35.0-65.9] | 17.3[15.1-24.0] | 25.6[19.1-34.8]  | 28.6[0.0-37.1]   | 26.4[16.7-34.3] | 33.3[0.0-100.0]  | 45.1[37.5-53.5] |
|                                                                        | Religion                   | 34.5[1.8-58.7]  | 62.9[57.0-73.1] | 53.9[45.9-63.9] | 44.8[28.7-76.1]  | 42.9[23.1-66.1]  | 57.0[46.2-66.0] | 66.7[0.0-100.0]  | 51.4[40.3-57.6] |
|                                                                        | I have no money            | 30.6[13.9-47.9] | 4.7[2.0-7.9]    | 2.2[0.0-9.4]    | 5.5[0.0-8.4]     | 0.0              | 4.0[0.0-7.9]    | 0.0              | 5.6[2.9-8.7]    |
|                                                                        | Dislike alcohol            | 67.8[55.7-80.9] | 85.4[81.5-91.8] | 85.0[64.6-91.3] | 99.2[96.0-100.0] | 85.7[71.4-100.0] | 87.9[79.8-93.8] | 66.7[0.0-100.0]  | 87.3[78.8-94.0] |
|                                                                        | Being at home              | 30.7[16.8-43.0] | 22.2[7.8-41.2]  | 5.1[0.0-21.2]   | 2.0[0.0-9.9]     | 17.9[0.0-33.3]   | 6.6[1.6-10.2]   | 0.0              | 5.6[0.5-8.1]    |
|                                                                        | Being at college           | 17.9[12.3-25.3] | 23.2[18.2-35.1] | 1.6[0.0-9.3]    | 7.3[1.9-17.6]    | 0.0              | 0.0             | 0.0              | 0.0             |
|                                                                        | I have health problems     | 7.0[0.0-16.8]   | 9.5[6.0-17.6]   | 6.0[0.0-8.0]    | 4.8[0.0-14.0]    | 7.1[0.0-16.0]    | 6.6[3.2-10.8]   | 0.0              | 10.6[6.6-14.0]  |
|                                                                        | I am afraid of side effect | 12.0[0.0-28.0]  | 23.0[15.0-33.9] | 6.8[2.3-27.4]   | 35.1[14.3-46.3]  | 10.7[0.0-33.3]   | 29.7[23.5-37.6] | 33.3[0.0-100.0]  | 23.9[19.0-34.2] |
|                                                                        | Other                      | 13.5[4.0-20.8]  | 9.3[0.0-22.5]   | 12.1[7.8-13.5]  | 6.1[0.7-17.3]    | 21.4[10.1-60.8]  | 24.2[12.9-34.4] | 33.3[0.0-100.0]  | 19.0[12.8-23.8] |

<sup>1</sup> Actual number of respondents ever used alcohol without sampling weights applied. <sup>2</sup> Actual number of respondents never used alcohol without sampling weights applied. <sup>3</sup> Actual number of respondents drunk alcohol in the last year among ever users without sampling weights applied. <sup>4</sup> Proportions are weighted estimates. <sup>5</sup> Proportions without sampling weights applied.
